# Non-invasive Temporal Interference Stimulation of the Hippocampus Suppresses Epileptic Biomarkers in Patients with Epilepsy: Biophysical Differences between Kilohertz and Amplitude Modulated Stimulation

Emma Acerbo<sup>1,2§</sup>, Florian Missey<sup>3§</sup>, Adam S. Dickey<sup>2</sup>, Jan Trajlinek<sup>3</sup>, Ondřej Studnička<sup>3</sup>, Claudia Lubrano<sup>3</sup>, Mariane de Araújo e Silva<sup>3</sup>, Evan Brady<sup>2</sup>, Vít Všíanský<sup>4</sup>, Johanna Szabo<sup>5</sup>, Irena Dolezalova<sup>4</sup>, Daniel Fabo<sup>5</sup>, Martin Pail<sup>4</sup>, Claire-Anne Gutekunst<sup>1</sup>, Rosanna Migliore<sup>6</sup>, Michele Migliore<sup>6,7</sup>, Stanislas Lagarde<sup>8,9</sup>, Romain Carron<sup>8,10</sup>, Fariba Karimi<sup>11</sup>, Raul Castillo Astorga<sup>13</sup>, Antonino M. Cassara<sup>11</sup>, Niels Kuster<sup>11,12</sup>, Esra Neufeld<sup>11</sup>, Fabrice Bartolomei<sup>8,9</sup>, Nigel P. Pedersen<sup>13</sup>, Robert E. Gross<sup>1,14</sup>, Viktor Jirsa<sup>8</sup>, Daniel L. Drane<sup>2,15,16</sup>, Milan Brázdil<sup>4</sup>, Adam Williamson<sup>3,17\*</sup>

<sup>1</sup>Department of Neurosurgery, Emory University School of Medicine, Atlanta, Georgia, USA; <sup>2</sup>Department of Neurology, Emory University School of Medicine, Atlanta, Georgia, USA; <sup>3</sup>International Clinical Research Center, St. Anne's University Hospital Brno, 60200 Brno, Czech Republic; <sup>4</sup>Brno Epilepsy Center, 1st Department of Neurology, St. Anne's Univ. Hospital and Faculty of Medicine, Masaryk University, member of the ERN EpiCARE, 60200 Brno, Czech Republic; <sup>5</sup>Institute of Neurosurgery and Neurointervention, Semmelweis University, Budapest, Hungary; <sup>6</sup>Institute of Biophysics, National Research Council, Palermo, Italy; <sup>7</sup>SUNY Dept. of Neurology, Downstate Health Science University, Brooklyn, NY, USA; <sup>8</sup>Aix-Marseille Université, Inserm, Institut de Neurosciences des Systèmes (INS) UMR\_S 1106, Marseille, France; <sup>9</sup>APHM, Timone Hospital, Epileptology Department, Marseille, France; <sup>10</sup>Department of Functional and Stereotactic Neurosurgery, Timone University Hospital, Marseille, France; <sup>11</sup>Foundation for Research on Information Technologies in Society (IT<sup>2</sup>S), Zurich, Switzerland; <sup>12</sup>Department of Information Technology and Electrical Engineering, Swiss Federal Institute of Technology (ETH), Zurich, Switzerland. <sup>13</sup>Department of Neurology, School of Medicine and Center for Neuroscience, University of California, Davis, CA USA; <sup>14</sup>Department of Neurosurgery, New Jersey Medical School and Robert Wood Johnson Medical School, Rutgers University, New Jersey, USA; <sup>15</sup>Departments of Pediatrics, Emory University School of Medicine, Atlanta, GA USA; <sup>16</sup>Department of Neurology, University of Washington School of Medicine, Seattle, WA USA; <sup>17</sup>Center for Social and Affective Neuroscience, Department of Biomedical and Clinical Sciences, Linköping University, Sweden

§co-first authors, contributed equally

correspondence: [adam.williamson@fnusa.cz](mailto:adam.williamson@fnusa.cz)

## Abstract

Medication-refractory focal epilepsy poses a significant challenge, with approximately 30% of patients ineligible for surgery due to the involvement of eloquent cortex in the epileptogenic network. For such patients with limited surgical options, electrical neuromodulation represents a promising alternative therapy. In this study, we investigate the potential of non-invasive temporal interference (TI) electrical stimulation to reduce epileptic biomarkers in patients with epilepsy by comparing intracerebral recordings obtained before, during, and after TI stimulation, and to those recorded during low and high kHz frequency (HF) sham stimulation. Thirteen patients with symptoms of mesiotemporal epilepsy (MTLE) and implanted with stereoelectroencephalography (sEEG) depth electrodes received TI stimulation with an amplitude modulation (AM) frequency of 130Hz ( $\Delta f$ ), where the AM was delivered with lower frequency kHz carriers (1kHz + 1.13kHz), or higher frequency carriers (9kHz + 9.13kHz), targeting the hippocampus – a common epileptic focus and consequently stimulation target in MTLE.

Our results show that TI stimulation yields a statistically significant decrease in interictal epileptiform discharges (IEDs) and pathological high-frequency oscillations (HFOs) – specifically Fast-ripples (FR) –, where the suppression is apparent in the hippocampal focus and propagation from the focus is reduced brain-wide. HF sham stimulation at 1kHz frequency also impacted the IED rate in the cortex, but without reaching the hippocampal focus. The HF sham effect diminished with increasing frequencies (2, 5, and 9kHz, respectively), specifically as a function of depth into the cortex. This depth dependence was not observed with the TI, independent of the employed carrier frequency (low or high kHz). Our findings underscore the possible application of TI in epilepsy, as an additional non-invasive brain stimulation tool, potentially offering opportunities to assess brain region responses to electrical neuromodulation before committing to a deep brain stimulation (DBS) or responsive neurostimulation (RNS) implant. Our results further demonstrate distinct biophysical differences between kHz and focal AM stimulation.

**Keywords:** Temporally Interfering Electric Fields, Non-Invasive Brain Stimulation, Neuromodulation, Epileptic Biomarkers, sEEG, Amplitude Modulation, Conduction Block

NOTE: This preprint reports new research that has not been certified by peer review and should not be used to guide clinical practice.

## Graphical Abstract

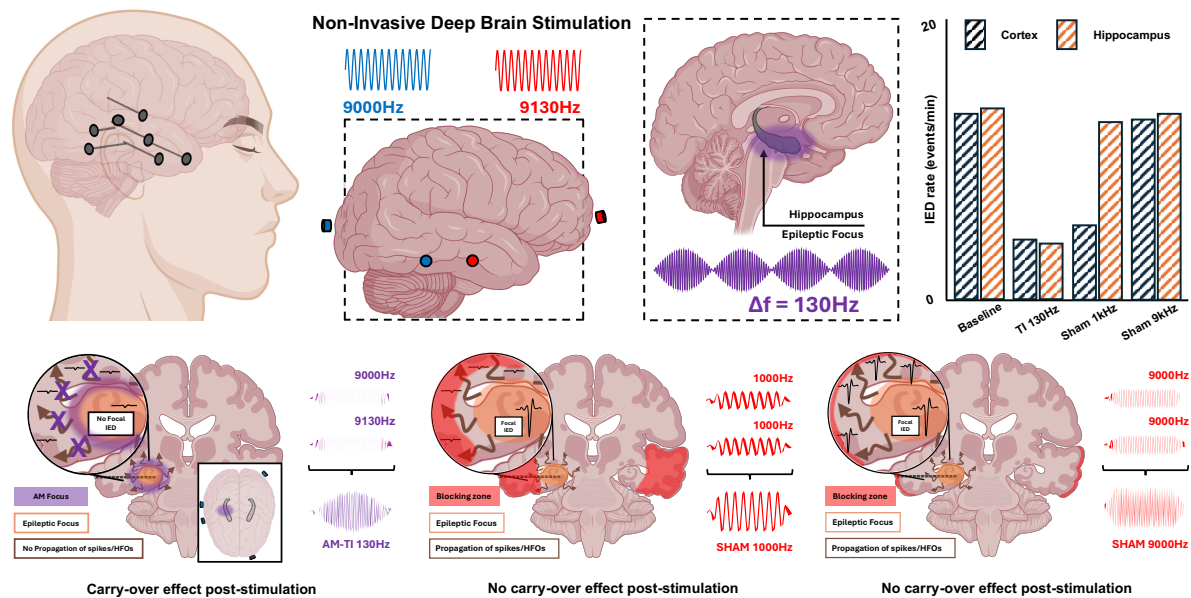

## Introduction

Epilepsy presents a significant neurological challenge as the origins of seizure generation in the brain are highly patient-specific, limiting initial treatment options to generalized medications which lack targeted precision<sup>1</sup>. Additionally, one-third of patients with seizures are drug-resistant, leaving resective surgery as the primary treatment option<sup>2</sup>. However, approximately 30% of drug-resistant patients are not suitable candidates for resective surgery due to the high functional importance of areas necessitating resection. In such cases, invasive brain stimulation – specifically deep brain stimulation (DBS) or responsive neurostimulation (RNS) – is typically the remaining therapeutic option<sup>3</sup>. Alternative neuromodulation treatments, such as Vagus Nerve Stimulation (VNS), are available for drug-resistant epilepsies but generally do not achieve complete seizure freedom<sup>4-7</sup>.

Both DBS and RNS are challenging as there are numerous potential targets (e.g., anterior nucleus of the thalamus - ANT, centromedian nucleus of the thalamus - CMT, pulvinar, hippocampus, and neocortex)<sup>8-12</sup>, and only a small number of targets (notably the ANT, CMT and hippocampus) have been thoroughly evaluated in double-blinded studies. DBS stimulation at 130-145Hz of either the hippocampus or ANT resulted in a reduction of seizure frequency<sup>10-14</sup>, along with a decrease in interictal epileptiform discharges (IEDs) in temporal lobe epilepsy patients<sup>15,16,17,18</sup>. A motivation for our study is that a subset of patients do not respond favorably to DBS or RNS and can suffer cognitive side effects, which are difficult to predict ahead of implantation<sup>19-21</sup>.

Non-invasive brain stimulation techniques targeting these regions identified as suitable DBS or RNS locations, could support the prediction of post-implant side effects prior to invasive implantation. The most common non-invasive techniques include transcranial alternating current stimulation (tACS), transcranial direct current stimulation (tDCS), and transcranial magnetic stimulation (TMS) – techniques with applications in both research and clinical practice<sup>22</sup>. They modulate neural activity via electric currents delivered through the scalp and skull to brain regions, where they influence neuronal excitability, connectivity, and plasticity, ultimately leading to changes in brain function<sup>23</sup>. However, efficacy of traditional non-invasive methods in the treatment of epilepsy is limited, and the methods are typically considered applicable only to target shallower cortical regions and not deep structures associated with therapeutic invasive DBS<sup>24</sup>.

Temporal Interference (TI) stimulation is an emerging non-invasive electrical stimulation technique which allows electrical modulation of deep brain structures. Unlike traditional

methods, TI applies high frequency currents (>1kHz) using a minimum of two independent pairs of transcutaneous stimulation electrodes. The employed frequencies differ slightly, resulting in an amplitude-modulated field because of alternating phases of constructive and destructive interference. The kHz current pathways are optimized to maximally and selectively amplitude-modulate the field at a specific deep brain target where the fields overlap<sup>25</sup>. The amplitude modulation (AM) frequency is equal to the frequency difference ( $\Delta f = |f_1 - f_2|$ ). When  $\Delta f$  is in the physiological range, there is evidence that neural activity is modulated. Notably, the frequency of the AM in previous experiments has been selected to replicate the conventionally applied DBS frequency to produce similar effects<sup>26</sup>. TI has been tested in rodent<sup>27-32</sup> and non-human primate models<sup>33</sup>, and more recently, in healthy human subjects<sup>34</sup>. We have previously employed TI stimulation using a 130 Hz envelope frequency, a frequency often used with invasive DBS for therapy in epilepsy patients, as well as epileptic animal models, and has been observed to suppress epileptic biomarkers<sup>27</sup>.

In the work here, we analyzed the impact of TI with a 130Hz AM signal in patients with epilepsy. Patients implanted with stereoelectroencephalography (sEEG) depth electrodes were hospitalized for 2 to 3 weeks during an assessment of potential resective surgery targets. sEEG electrodes are designed for recording intracranial electrophysiological signals and stimulating precise deep brain areas to assist in the delineation of the epileptogenic zone (EZ) and its relation with eloquent cortices. Utilizing recordings from the sEEG electrodes during TI, we were able to investigate the alterations in epileptic biomarkers as a function of TI stimulation and to map the stimulation artifact in order to ascertain hippocampal focality, using a  $\Delta f=130\text{Hz}$  frequency modulation. The study has taken place at three research centers, Emory University (USA), St. Anne's University Hospital (Czech Republic), and Semmelweis University (Hungary).

Our results demonstrate that TI stimulation significantly decreases interictal epileptiform discharges (IEDs) and pathological high-frequency oscillations (HFOs) – specifically fast-ripples (FR) – within the hippocampal focus and reduces propagation across the brain. In contrast, sham stimulation at lower kilohertz (kHz) frequencies impacted cortical but not hippocampal IEDs, with diminishing effectiveness at higher kHz frequencies. The results suggest distinct differences in biophysical mechanisms and associated response characteristics from kHz compared to focal amplitude modulation.

## Methods

**Patients:** 13 patients with drug-resistant focal epilepsy and symptoms of mesiotemporal epilepsy participated in the study after providing informed consent. All procedures involving human participants were conducted following the ethical standards of the institutional and/or national research committee (IRB00099109 Emory University, IIT/2023/25 Saint-Anne University Hospital - SAUH, OGYÉI/56526-2/2023 Institute of Neurosurgery and Neurointervention, Semmelweis University - INN-SU) and in accordance with the 1964 Helsinki Declaration and its later amendments or comparable ethical standards. Informed consents from patients were collected before any TI stimulation. All experiments were conducted after a clinical trial registration and agreement (NCT06716866). Presurgical non-invasive examinations, including high-resolution MRI scans, were performed to assess patient eligibility. Intracerebral multi-contact electrodes (Alcis® - INN-SU, Hungarian center; Dixi® - Emory University, USA center and SAUH, Czech center; 10-18 contacts) were surgically implanted for sEEG exploration. Postoperative computed tomography (CT) scans and/or MRI scans were conducted to verify the absence of complications and ensure accurate electrode placement using the GUI-based open-source application GARDEL<sup>35</sup>. Across all centers, patients underwent the stimulation protocols 6 to 10 days post-implantation.

**Modeling and simulations:** Finite element simulations were executed utilizing both Sim4Life and TI Planning Tool software developed by Zurich MedTech AG to estimate temporal interference stimulation. The simulations solved the ohmic-current-dominated electroquasistatic equation  $\nabla(\sigma\nabla\phi) = 0$ . Here,  $\sigma$  denotes the local electrical conductivity,  $\phi$  the electric potential, and the E-field is obtained as  $E = -\nabla\phi$ . The ohmic-current-dominated electroquasistatic approximation of Maxwell's equations is suitable because  $\sigma \gg \omega\epsilon$  ( $\omega$ : angular

frequency,  $\epsilon$ : permittivity; i.e., ohmic currents dominate over displacement currents) and the wavelength is much larger than the domain size.

The human model utilized in the Sim4Life simulations was derived from patient-specific MRI scans (coregistered T1 and CT). The head model for each patient included the associated implanted sEEG electrodes. All patients had the sEEG locations included in the model for postprocessing. However, only the patients from the FNUSA center had the sEEG electrodes properly modeled with recording contacts as Perfect Electrical Conductors (PEC) and inter-contacts as insulators. Tissue and electrode conductivities, were automatically allocated to the model based on the ITI'S Foundation tissue properties database<sup>36</sup> (low-frequency conductivities section). Stimulation electrodes mirrored the shape of the gel-based electrodes used in human experiments. Simulation results were normalized to total current, after applying Dirichlet boundary conditions at active electrodes. Equation 1 from Grossman et al., 2017<sup>25</sup>, was leveraged to calculate the maximum modulation amplitude:

$$|\vec{E}_{AM}^{max}(\vec{r})| = 2|\vec{E}_2(\vec{r})| \quad \text{if } |\vec{E}_2(\vec{r})| < |\vec{E}_1(\vec{r})| \cos \alpha$$

**Equation 1. Maximum amplitude modulation formula.**

Otherwise

$$|\vec{E}_{AM}^{max}(\vec{r})| = \frac{2|\vec{E}_2(\vec{r}) \times (\vec{E}_1(\vec{r}) - \vec{E}_2(\vec{r}))|}{|\vec{E}_1(\vec{r}) - \vec{E}_2(\vec{r})|}$$

**Recordings:** sEEG signals were recorded using a digital system (Natus Medical Incorporated®) with a sampling rate of at least 1024 Hz for Emory University. Recordings in all other patients were performed using a Digital amplifier BioSDA09 (M&I, spol. s r.o.®). The BioSDA09 has a sampling rate of 25kHz and supports input signal voltages of +/- 25 mV (0.01 Hz - 10 kHz), which allows to monitor stimulation voltages (sEEG artifact) during TI or sham stimulation. Patients remained awake during recording sessions to capture accurate neural activity.

**Stimulation (TI/sham):** Stimulation was applied to target the hippocampus, as the patients exhibited the most IEDs in the hippocampus and the hippocampus was the putative epileptic focus, i.e., the brain region believed to be the origin of the epileptic seizures.

TI Stimulation was performed using 2 DS5 devices (Digitimer®, UK) driven by a function generator (Keysight®). Electrodes (circular-shaped gel-assisted ECG electrodes, Ag/AgCl, 0.8 cm diameter, Ambu® or FIAB®) were used to provide the TI stimulation. They were placed according to *Violante et al.*<sup>34</sup> to target the hippocampus. Frequencies of TI stimulation varied among centers: the Emory center used 1300 and 1430 Hz, and the Czech and Hungary centers 9000 and 9130 Hz, applying  $\pm 2$ mA per pair (4mA peak-to-peak). Stimulation sessions lasted 20 minutes, with a baseline recording of at least 20 minutes preceding any stimulation. In the sham condition, only carrier frequencies were applied with no modulation (no offset frequency, same current as applied in the TI session). Sham stimulation protocols were conducted at SAUH and FNUSA. Post-stimulation recordings were obtained in the 20 minute period following TI stimulation, as well as another recording 24 hours after stimulation (Fig. 2).

**AM Analysis:** To accurately identify the anatomical locations of sEEG electrodes, Gardel was utilized. The MRI image was co-registered with the CT image to operate within the CT space, enabling automated detection and manual labeling of the electrodes. Initially, the recorded signal underwent bandpass filtering with passband frequencies of [1000 10000] for TI. Subsequently, the AM magnitude was computed using the Hilbert transformation of the filtered signal. A sliding window of 230ms was employed to determine the peak-to-peak amplitude of the AM in mV by subtracting the minimum from the maximum AM values. The median value across all windows was utilized as the amplitude value for each contact. This process was conducted for each contact, providing amplitude values per contact (the reference was set as the averaged signal from all the electrodes in the brain). Finally, the amplitude values were projected onto the electrodes within the anatomical mesh of the patient to visually assess which brain regions received stimulation.

**Biomarkers Detection:** Before any biomarkers detection, electrophysiological signals were filtered (lowpass filtering [ $<1000\text{Hz}$ ], performed using Matlab - MathWorks) to remove the stimulation artifacts. After down-sampling to 2500 Hz, semi-automatic detection of IEDs and HFOs (ripples and fast ripples) was performed using the AnyWave's Delphos detector<sup>37</sup> – a well-established IED and HFO detector, regularly used in clinical epilepsy research<sup>38</sup>. Events of interest are detected if they are between a specific threshold in the frequency spectrum. Events (IEDs, HFOs) were extracted in MATLAB format to determine their rates per minute. Subsequently, detected events were reviewed using AnyWave, a visualization software for electrophysiological data<sup>37</sup>.

**Statistics:** The results of the detection process were imported into MATLAB (MathWorks), to facilitate comprehensive analysis and statistical assessment, and organized into distinct matrices based on patient identifiers, treatment centers (EMORY, INN-SU, or SAUH), and protocol conditions (baseline, stimulation, sham, post, and post 24H). From these matrices, initial visualizations were generated for each patient before aggregation for inter/intra-patient and inter/intra-center statistical assessments. IED, ripple ([80 150]Hz), and fast ripple ([150 250]Hz) rates were computed and juxtaposed across different stimulation protocols, as illustrated in Fig. 2, employing multivariate analysis of variance (ANOVA or Friedman test) and paired T or Mann-Whitney-Wilcoxon tests to discern significant variations. The aggregated dataset underwent further comparison via Friedman ANOVA and paired Wilcoxon tests to identify potential differences across all experimental conditions.

**Single neuron modeling;** To study the interaction between a hippocampal CA1 pyramidal neuron and electrical fields we used a previously published model<sup>39,40</sup>, available online on the ModelDB database (a.n. 151731 and 190559, respectively). A detailed morphological and biophysical reconstruction of a CA1 pyramidal neuron<sup>41</sup> (cellc62564 from Migliore *et al.* (2008), ModelDB a.n. 87535) was used for all simulations. A first set of simulations was performed in current clamp mode, injecting one or two currents for 1 sec and implemented as Equation 2 at different amplitudes  $I_0$ .

$$I_{inj} = I_0 \sin[2\pi f(t - t_0)] \text{ or } I_{inj} = I_0 \sin[2\pi f(t - t_0)] + I_0 \sin[2\pi(f + f_{off})(t - t_0) + \varphi]$$

### Equation 2. Injected current formula.

In a second set of simulations, we applied one or two extracellular planar electric fields – Equation 3 aligned either parallel or transverse to the main apical trunk of the neuron. The field lasted for 3 seconds, and different amplitudes ( $EF_0$ ) and frequencies ( $f$  and  $f_{off}$ ) were used.

$$(EF_{ext} = EF_0 \sin[2\pi f(t - t_0)] \quad \text{and} \quad EF_{ext} = EF_0 \sin[2\pi f(t - t_0)] + EF_0 \sin[2\pi(f + f_{off})(t - t_0) + \varphi],$$

### Equation 2. Applied extracellular electric field formula.

All simulations were performed using v.8.2.2 of the NEURON simulation environment (Hines and Carnevale, 1997)<sup>42</sup>.

## Results

### Temporal Interference Protocol in S EEG-implemented Epilepsy Patients

As seen in Figure 1A, TI stimulation was performed in patients with epilepsy implanted with sEEG electrodes. The setup involved the placement of four skin electrodes (2 pairs of 2 electrodes) on the patient's skin to deliver TI stimulation, which consisted of two high-frequency signals monolaterally targeting the hippocampus (side with the epileptic focus). sEEG electrodes recorded the electrophysiological signal changes evoked by TI and mapped the AM exposure from the TI stimulation. Epilepsy patients with implanted sEEG electrodes offer a unique opportunity to precisely delineate the stimulated zone and assess the impact of exposure on brain activity.

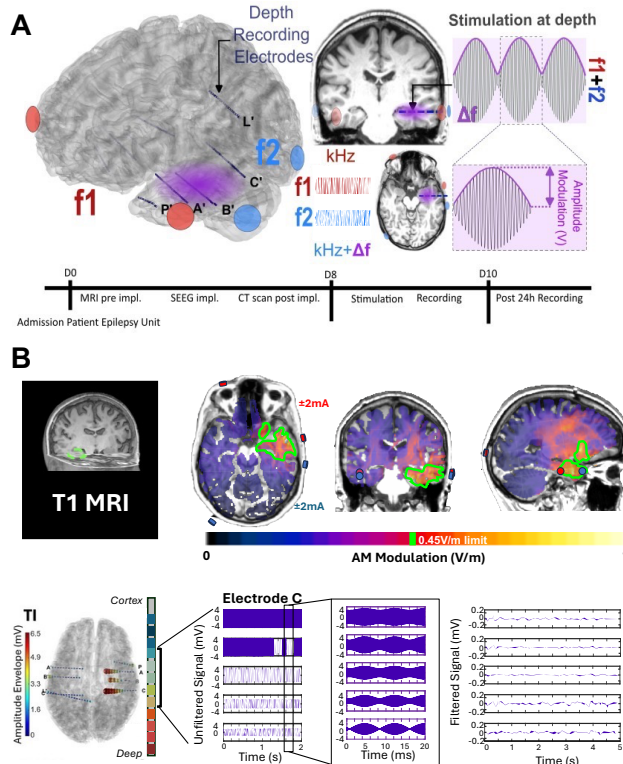

**Figure 1. Temporal interference protocol in sEEG-implemented patients with epilepsy.**

(A) Skin electrodes were positioned to deliver TI stimulation, consisting of two high-frequency currents which produce an AM field targeting the hippocampus in the temporal lobe. sEEG electrodes simultaneously record the electrophysiological signal and the modulated TI stimulation signal. Timeline of the experiments performed at the 3 centers: Admission Day 0, Stimulation Days 8-9. Each center applied TI with an AM frequency  $\Delta f = 130\text{Hz}$ , during a 20-minute stimulation session and recorded the brain signal response after stimulation. (B) **Patient-specific head model and AM signal from TI stimulation.** MRIs of patients were used to create patient-specific head models using Sim4Life. (Top panel) the example simulation shows the placement of stimulation electrodes (red/blue) to target the ipsilateral hippocampus. The green border depicts an isocontour of the maximum AM electric field, indicating the most stimulated region, which is centered on the hippocampus. (Bottom panel) simulations compare well to intracranial data, which similarly shows maximum AM in the temporal lobe (electrodes A, B, C), specifically in

the hippocampus. Example recordings from the middle contacts of electrode C are shown. The raw signal (with using the average of all intracranial signals as reference) during TI stimulation allows visualization of the amplitude of the AM signal. When zooming in, the stimulation artifact revealed a well-defined AM in the deepest contacts, with diminishing magnitude approaching the cortex. The exact same recordings during TI stimulation are shown filtered with a bandpass filter ([1-1000] Hz) to extract electrophysiological signals. All oscillations below 500Hz were retrieved, and reduced interictal spiking activity was observed for the TI condition.

### Simulation and Visualization of Stimulation Site

As seen in Figure 1B (top panel), an MRI image of a patient with stimulation electrodes specifically targeting the ipsilateral hippocampus. The associated patient-specific simulation of the TI exposure targeting the hippocampus is visualized using Sim4life. The simulation estimates the asse the electrode position for a correct stimulation of the hippocampus and delineates the region of strong AM modulation (green border) within the temporal region - with the maximum modulation located in the patient's hippocampus.

### Recordings of AM Potential

An example sEEG recording of the AM potential during TI stimulation can be seen in Figure 1B (bottom panel). The amplitude of the AM was extracted and is depicted on the contacts of each sEEG electrode in the figure. The highest AM was observed on the electrodes within the temporal lobe, specifically in the hippocampus, and showed good agreement with the patient-specific Sim4Life simulations. The AM magnitude progressively diminishes towards more superficial cortical regions, while the magnitude of the carrier increases. An analysis of the

filtered signal ([1-1000]Hz) demonstrated the ability to extract electrophysiological signals (IEDs/HFOs), as TI stimulation artifacts are generally several thousand Hz higher than the electrophysiological signal of interest. No IEDs are visible in the example recording.

### Epileptic Biomarker Suppression with TI

All patients underwent the same protocol (see Figure 2A) consisting of 20 minute blocks: baseline recording, TI stimulation, post-stimulation recording (in the 20 minutes after the stimulation), and (at FNUSA only) an additional post-stimulation recording 24 hours after the stimulation session. During TI stimulation, patients did not report any adverse events, such as harmful sensations on the skin, and no adverse neurological events were observed or reported.

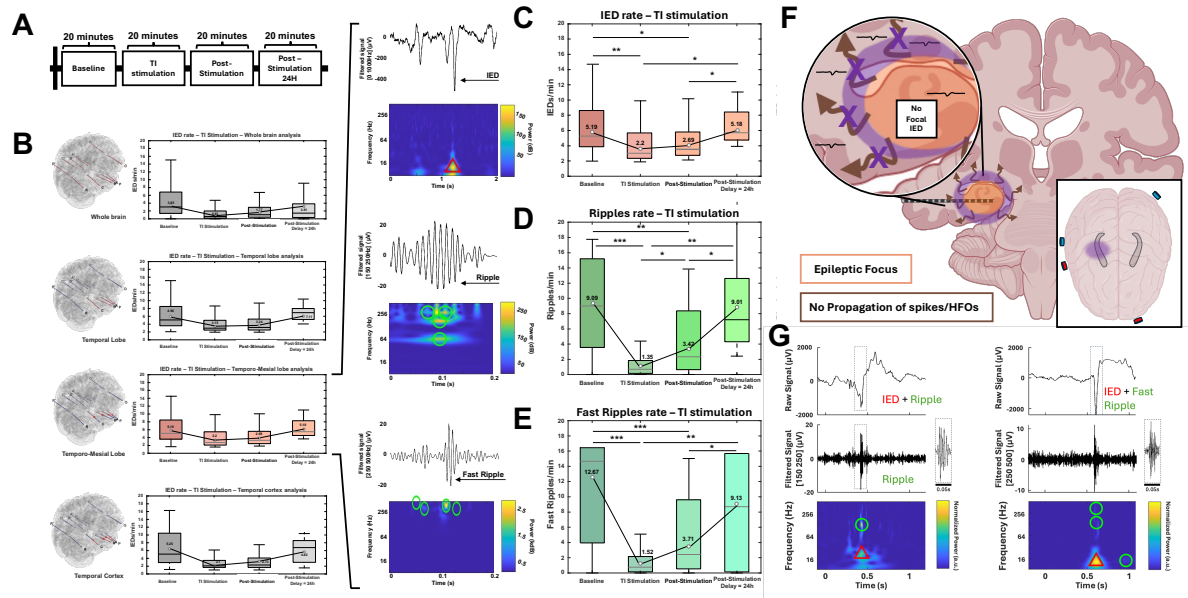

**Figure 2. Epileptic biomarkers are suppressed during TI stimulation, a strong post-stimulation carrier-over effect is observed.** (A) The stimulation protocol was the same across the different centers (USA, Czech Republic, Hungary). Center-to-center differences are shown in Supplemental Figure S1. The protocol includes baseline recording (20 minutes), TI stimulation protocol (20 minutes; 30-second ramp-up and 30-second ramp-down included), post-stimulation recording (20 minutes), and – only in Czech Republic – post-24-hour recording (20 minutes). (B) Analysis of interictal epileptiform discharge (IED) rates by brain region. All regions show a decrease in IED rate during TI stimulation. Analysis comparing all biomarker rates across all centers from the mesial temporal focus (n.s.: p-value > 0.05; \*: p-value ≤ 0.05; \*\*: p-value ≤ 0.01; \*\*\*: p-value ≤ 0.001). (C, D, and E) Looking at the epileptic focus in detail: TI stimulation significantly decreases IEDs, ripples, and fast-ripples, in a way similar to responses in DBS studies<sup>40,41</sup>. A feature of the TI biomarker suppression is that, in addition to the suppression during stimulation, the biomarkers do not return to their pre-stimulation values in the 20-minute period after stimulation – the suppression has a strong carrier-over effect. The 24-hour recordings indicate that the suppression is not permanent, seeing that biomarkers have returned to their pre-stimulation values. Brain-wide suppression of IEDs is a good indication that the focus of the epilepsy (the location of spike generation; in these patients the mesial temporal region, specifically the hippocampus) has been suppressed. (F) As the focus was suppressed, we expected and observe limited generation and therefore limited propagation of spikes and HFOs. (G) The simultaneous suppression of HFOs and IEDs is understood via co-occurrence: it is well-known that HFOs strongly co-occur within IEDs. This co-occurrence also appears in our data.

We compared the distribution of IEDs detected by sEEG in various brain regions (see Figure 2B): the whole brain, the temporal lobe, the temporo-mesial area (the hippocampal focus), and the temporal cortex. All analyses were realized with the ‘global group’ which encompasses all patients from the 3 centers. In baseline recordings, all patients showed signs of temporal lobe epilepsy, with a hippocampal focus. TI stimulation produced a statistically significant decrease in IED rate across all brain regions, which suggests that the focus was suppressed (spikes originating from an unsuppressed additional focus would be visible). Post-stimulation data shows a strong carry-over effect with IEDs not returning immediately to baseline values.

The post-stimulation recording 24 hours later shows that the IED rate returned to the baseline level.

Specific analysis of TI's impact on the epileptic biomarkers (IEDs, ripples, and fast ripples), specifically in the temporo-mesial region with the hippocampal focus, is presented in Figure 2C, D, and E. All epileptic biomarkers were statistically decreased during TI stimulation in the focus compared to the baseline recordings (Friedman ANOVA,  $p$ -value  $< 0.0001$ ). In all three centers, TI stimulation of the hippocampus was correlated with a decrease in IEDs (center-to-center data in supplemental figures). The relative decrease ranged up to 86.3% (58.5  $\pm$  27.8%, IC95%) depending on the patient (Friedman ANOVA,  $p$ -value<sub>TI stimulation vs. baseline</sub>  $< 0.0001$ ).

For HFOs, it is well established that ripples and fast ripples co-occur within IEDs. Our data shows a reduction of IEDs with a corresponding reduction of co-occurring HFOs<sup>43,44</sup>. For all three centers, the stimulation effect sustained, as evident in a significant decrease in IEDs and HFOs 20 minutes after stimulation (Wilcoxon tests,  $p$ -value<sub>Post-stimulation 20 minutes vs. baseline</sub>  $< 0.0001$ ). An example of co-occurrence in our data is shown in Figure 2G. TI stimulation (Figure 2F; purple) targeting the pathological hippocampal focus (orange) shows a strong suppression of epileptic biomarkers, and a suppression of the propagation of biomarkers, with a sustained post-stimulation carry-over effect.

### **Epileptic Biomarkers Suppression with kHz (Sham) Stimulation**

As TI is delivered via a combination of kHz frequencies, we investigated the effect of sham stimulation, where both pairs of electrodes provide the same frequency and no offset is present between  $f_1$  and  $f_2$  (Figure 3A). The patients received electrical stimulation at 1kHz, 2kHz, 5kHz, or 9kHz. Previous studies using simulations of injected charge with a Hodgkin-Huxley (HH) axon model have suggested kHz conduction block as a possible side-effect of TI deep brain modulation. A deep brain region may respond to the AM signal, but shallower brain regions will be subjected to stronger kHz fields which may lead to conduction block. We believe that we observe this phenomenon when using lower frequency kHz carriers, and, as predicted by models to a diminishing degree as the frequencies increase further, as activation thresholds increase with kHz frequency (Figure 4B).

However, some models predict that shifting the carrier frequency up (while maintaining  $\Delta f$  constant) to reduce conduction block, will simultaneously reduce the modulatory effectiveness of AM. We do not observe this experimentally. More precisely, we did not see any effect of the carrier frequency when comparing the biomarker rates during TI stimulation (Wilcoxon tests,  $p$ -value<sub>TI1000Hz vs TI9000Hz</sub>  $> 0.05$ ).

As seen in Figure 3A, all sham patients underwent the same protocol in blocks of 20 minutes: a baseline recording, kHz sham stimulation (two pairs of electrodes with no offset frequency – applying the same currents as for TI stimulation), and a post-stimulation recording (for 20 minutes after stimulation). The electrode locations were also identical to the TI stimulation electrode locations. Patient-specific Sim4Life simulations were performed to determine the carrier field magnitude distribution. The illustrative visualization in Figure 3B delineates the region of maximum kHz exposure (top panel), situated in the temporal region, and the expected absence of AM (middle panel). sEEG electrodes were used to record the electrophysiological signal changes evoked by sham and to map the sham exposure potential (bottom panel). The example recording features IEDs in the hippocampal focus (highlighted by red arrow), but not in the cortex where there is a higher kHz field magnitude.



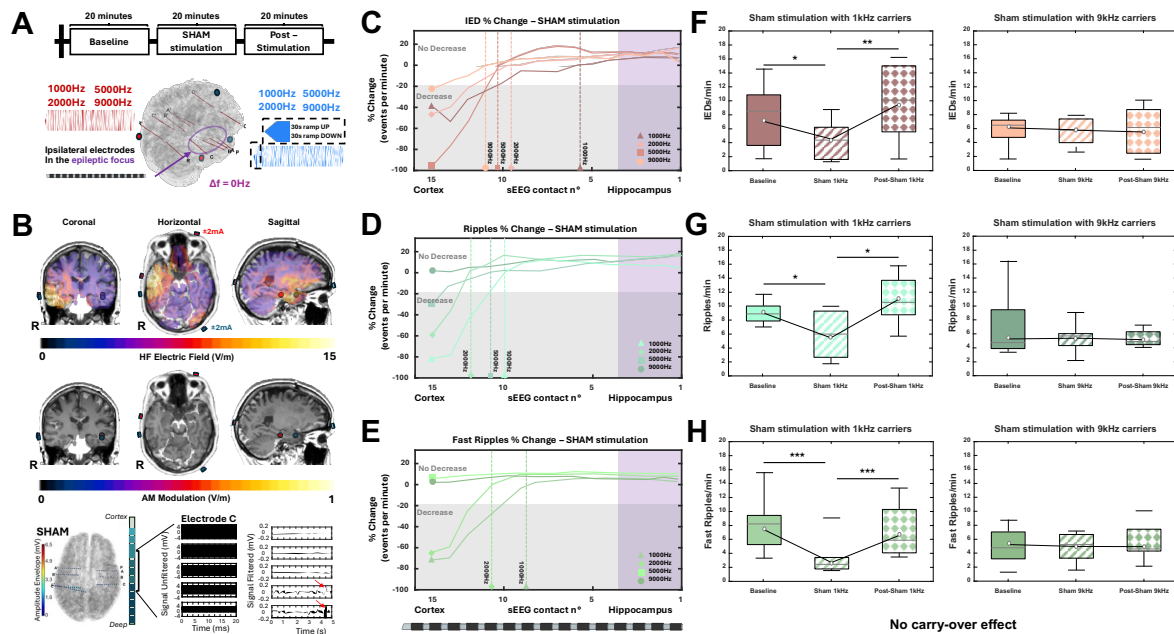

**Figure 3. Sham stimulation and HFO suppression.** Sham stimulation consisted of applying the same frequency ( $f_1 = f_2$ ) to both pairs of electrodes. The protocol is 20 minutes baseline recording, 20 minutes sham stimulation and recording, and 20 minutes post-stimulation recording. A 30-second ramp-up and a 30-second ramp-down is included to avoid unwanted transients. The stimulation amplitude is  $\pm 2$ mA (4mA peak-to-peak) (A). As for the TI stimulation condition, a patient-specific simulation is performed to estimate the kHz field strength and illustrate the absence of AM. The sham voltage recorded by sEEG in a patient is visualized. After filtering, example IEDs (red arrows) are apparent in the hippocampus recordings, but not in the cortical ones (B). The changes in biomarker rate between baseline and sham stimulation are plotted as a function of location along the ipsilateral sEEG electrode entering the pathological hippocampus. The zero line (dashed line) and grey region denote the absence of a significant rate difference between baseline and sham. sEEG contact locations in the epileptic focus are highlighted in purple. A biomarker rate reduction of over 20% is considered a clear indication of sham suppression. As can be seen, suppression penetrates the deepest at 1kHz. At 9kHz change remains below  $\pm 20\%$  throughout for all biomarkers (C, D, E). Biomarkers are plotted for the three steps of the sham protocol using the cortical contacts (F, G, H). 1kHz caused a significant suppression during stimulation, potentially due to conduction block. 9kHz did not cause significant suppression. In each case, there was no visible carrier-over effect, unlike the TI conditions.

The effects of kHz sham on biomarker rates are shown in Figure 3C, D, and E, as a function of depth along the sEEG electrode into the ipsilateral hippocampal focus. IEDs, ripples, and fast ripples rate changes are pictured in C, D, and E respectively. Fluctuations outside of the  $\pm 20\%$  range are considered a clear indication of kHz suppression of a biomarker, rather than physiological variations between the two 20-minute sessions of baseline and sham<sup>45</sup>. Vertical dotted lines represent the depth at which the sham stimulation moves the trend of the biomarker to decreased values compared to the baseline. Contacts from 15 to 10 are located in the cortex and contacts from 10 to 1 are in the deep brain.

As evident, higher frequencies (i.e. 7 and 9 kHz) show less biomarker reduction compared to lower carrier frequencies (i.e. 1 and 2kHz). Lower frequencies are, furthermore, associated with deeper penetration of rate changes. 9kHz sham hardly affects the biomarkers.

As shown in detail for 1kHz and 9kHz in Figure 3 F, G, and H, a common trend is visible across all biomarkers: a sham-stimulation induced decrease in IEDs and HFOs (ripples and fast ripples) at lower kHz frequencies in the cortex, but not at depth, in the hippocampus; but an absence of decrease at 9kHz. Additionally, for low-frequency kHz suppression, there is no significant carry-over effect.

Overall, these results suggest that TI stimulation can reduce HFOs and IEDs, when targeting the hippocampus with a modulation at a traditionally inhibitory frequency (130 Hz). For sham, mid/low-carrier frequencies ( $\leq 5$ kHz) also decrease the number of epileptic biomarkers, but only in the shallower brain. With a 130 Hz AM, the highest frequency we tested (9kHz) caused a significant decrease in all epileptogenic biomarkers, while the corresponding sham condition,

did not change ripple and fast ripple rates, and had the least effect on IEDs. The carrier frequency selection seems to play an important role for the use of TI as a focal, non-invasive form of deep brain modulation, i.e. 9kHz induces less off-target neuromodulation than 1kHz, due to the absence of kHz carrier field effects.

## Discussion

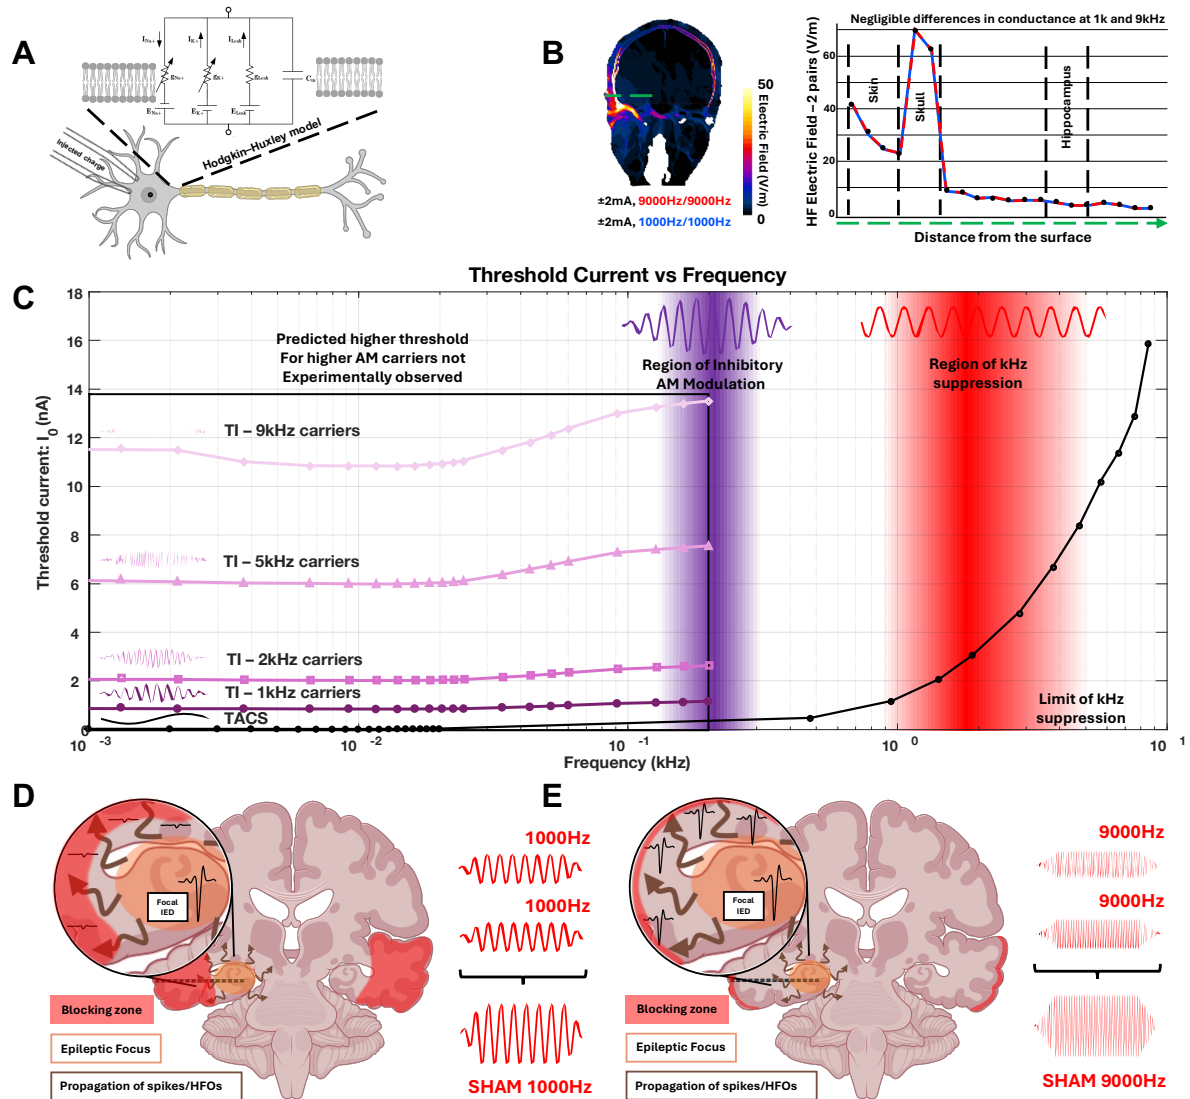

**Figure 4. Biophysics Insights.** **A)** Previous work simulating exposure-induced neuromodulation of a Hodgkin-Huxley-like (HH) axon model has highlighted the potential for conduction block in TI stimulation<sup>46</sup>. Our sham stimulation results are consistent with some of the concerns raised by those authors. **B)** Experimental work by Bernard Katz<sup>47</sup> and simulations with an HH-like neuron model (shown in **B**), showed that the threshold for propagation blocking by unmodulated exposure (red shading) increases with frequency (the threshold obviously depends on diameter, fiber type, etc.). This is in accordance with the blocking of IED propagation from the hippocampal focus observed in this study for low kHz sham frequencies and the experimentally demonstrated decrease in the conduction block depth with increasing carrier frequency (fading red). However, the HH model fails to replicate the experimentally observed absence of a strong carrier frequency impact on AM effectivity. Moving to a higher carrier frequency eliminated sham effects - however, the AM signal created with the same higher carrier frequency suppressed the epileptic focus without apparent reduction in efficacy (purple region). **C)** The carrier frequency dependence of sham effects cannot be explained by field magnitude differences, as electrical conductivity hardly depends on frequency below 10 kHz, such that for identical channel current magnitudes the quasistatic solutions to Maxwell equations are very similar – only at higher frequencies, the frequency dependence of conductivity and its impact on displacement currents becomes relevant. Also head and contact impedance changes as a function of frequency are fully compensated for by the current control of the sources (see supplemental figure S5). **(D – E)** The depth-dependent suppression of IEDs, which was observed for sham

stimulation, could originate from conduction block and its decrease with frequency from the increasing threshold of activation. At the same applied stimulation current, the blocking threshold for 9kHz will necessarily need a higher stimulation value than the threshold for 1kHz. Support for assuming that two different mechanisms are at work could be derived from the lack of a carry-over effect from sham stimulation (turning off the high-frequency allowed activity to propagate normally again), while AM exposure produced a strong carry-over effect, where suppression of the hippocampal focus resulted in a continued reduction of epileptic biomarkers post-stimulation.

Here we show for the first time that a method of non-invasive deep brain modulation, Temporal Interference, can selectively target the epileptic focus and reduce epileptic biomarkers in epilepsy patients, as verified by deep brain recordings from sEEG depth electrodes. We show that TI can create an AM signal at depth in the human hippocampus and that TI stimulation at  $\Delta f = 130\text{Hz}$  can significantly reduce IEDs, ripples, and fast ripples during stimulation. Furthermore, we show that the choice of carrier frequencies matters for TI stimulation. As illustrated in Figure 4A and C, our results are consistent with the presence of conduction block, primarily in superficial structures, at low kHz frequencies. However, conduction blocking, as well as simple HH models of neural dynamics, fail to explain, how TI with higher kHz carriers avoids conduction blocking (as does sham at those frequencies) and nevertheless effects targeted, non-invasive, and deep brain modulation – something that previous studies had ruled out based on theoretical and computational considerations<sup>59</sup>. This highlights the importance of clarifying the mechanisms underlying TI neuromodulation.

In terms of future utilization in epilepsy, the application of TI stimulation represents a significant advancement in the pursuit of non-invasive diagnosis and therapy for epilepsy, particularly for patients who are not suitable candidates for resective surgery. Unlike conventional transcranial electrical stimulation techniques, such as tDCS and tACS, which are limited by the dominance of superficial cortical effects, TI stimulation allows for the modulation of neural activity in deeper brain structures without invasive procedures. This is particularly relevant for targeting epileptogenic zones located in areas of the brain which are not easily accessible by traditional stimulation methods or only by electrical stimulation via depth probes<sup>48,49</sup>.

In previous work, TI stimulation in the peripheral<sup>29</sup> and central nervous systems modulates population-wide neural activity<sup>50</sup> as well as individual neuronal activity<sup>51</sup>, when employing  $\Delta f$  frequencies similar to those found to be effective when applied directly (i.e.  $\Delta f = 1\text{Hz}$  affecting activity at a rate of 1 Hz – as is expected if 1Hz is directly applied). Our findings here are similarly in line with previous research, namely studies conducted in the hippocampus of mice in an epilepsy model<sup>27</sup> as well as with various clinical studies which have used DBS stimulation (130-145Hz) in the hippocampus of patients to manage their seizures and decrease epileptogenic biomarkers<sup>3,10,13,14,52-54</sup>.

Future work could leverage the ability of TI to reduce IEDs non-invasively and in a targeted manner, as there is growing awareness that IEDs can transiently disrupt focal and global cognitive processes, and anti-seizure medications are currently not deliverable in a focal manner<sup>55-58</sup>. In that sense, TI could be a valuable tool in neurological investigation of cognitive task performance with epilepsy patients. Indeed, even for conduction block, as we observed for lower kHz frequencies, it is possible that this mechanism could be used beneficially in the context of epilepsy in future work.

While the presented results are promising, several limitations must be acknowledged. First, the study's reliance on patients already implanted with sEEG electrodes for epilepsy monitoring and who feature identifiable seizure foci means that the findings may not be directly generalizable to the broader population with refractory epilepsy – for example in generalized seizures, where identification of specific EZs is not possible. Furthermore, we only investigated the hippocampus and not neocortical EZs, because we aimed at demonstrating the feasibility of stimulating deep structures. Additionally, the specificity and efficacy of TI stimulation in reducing seizures and seizure frequency remains to be fully established through longitudinal studies with larger sample populations.

Finally, the observed impact of sham stimulation at frequencies of 1kHz and 2kHz raises concerns regarding its potential influence on neuronal activity. This was highlighted through c-fos staining in rats subjected to TI stimulation at 2kHz<sup>30</sup>. In line with the findings of Grossman *et al.*<sup>25</sup>, Carmona-Barrón *et al.*, replicated the experiment and demonstrated a significant

conduction block effect beneath the electrodes, suggesting that neurons beneath the electrodes were effectively disabled, potentially accounting for the observed effects of sham stimulation at 1kHz and 2kHz. Interestingly, our study indicates that increasing the carrier frequency renders sham stimulation less effective for IED reduction and ineffective for ripples and fast ripples suppression, while TI stimulation remained strongly impactful.

## **Conclusion**

In conclusion, the application of TI stimulation in patients with epilepsy represents a novel and promising approach to non-invasive epilepsy treatment. While preliminary findings are encouraging, further research is essential to elucidate the potential of TI stimulation to help manage focal epilepsy, in particular as a tool to assess neurostimulation responses prior to DBS or RNS implantation.

Future research should expand the number and diversity of studied patients undergoing TI stimulation, to better understand its efficacy and safety profile across different types of epilepsy and to assess the long-term impact of stimulation. Additionally, further investigation into the mechanisms underlying the effects of TI stimulation are required to enhance our understanding of TI and epilepsy pathophysiology and to be able to systematically optimize and personalize stimulation parameters in the spirit of precision medicine.

## **Acknowledgments**

A.W. received funding from the European Union's Horizon Europe research and innovation programme under grant agreement No. 101101040 (TREATMENT) and No. 101088623 (EMUNITI). Efforts on this project for both D.L.D. and E.A. were in part supported by grants received from the National Institute of Neurological Disorders and Stroke (NINDS) of the National Institutes of Health (NIH) [R01NS088748]. E.A. was also supported through the Emory Neuromodulation Technology Innovation Center (ENTICE) and a Catalyst Award from the Emory Neurosurgery Department to C.A.G. and D.L.D. E.A. was also supported by the American Epilepsy Society (AES) post doctoral fellowship. We thank S. Dabiri for his assistance in downloading MRI and electrophysiological recordings. We extend our thanks to the dedicated nurses at the epilepsy units of Emory University, St. Anne's University Hospital, and Semmelweis University for their invaluable support.

## **Authors Contribution**

A.W. conceived and designed the project. E.A., F.M., A.D., J.T., O.S., C.L., M.A.S., E.B., V.V., J.S., D.F., conducted human experiments and acquired neural data. E.A. and F.M. analyzed neural data. F.M. created the patient-specific head models and performed the associated finite-element models. R.M. and M.M. designed and analyzed single-neuron models. E.A., F.M., D.L.D., and A.W. wrote the first draft of the manuscript and refined it after inputs from I.D., M.P., C.A.G., S.L., R.C., F.K., R.C.A., A.M.C., N.K., E.N., F.B., N.P.P, R.E.G, V.J., and M.B.

## **Conflict of Interest**

N.K. and E.N. are shareholders of TI Solutions AG, a company dedicated to producing temporal interference (TI) stimulation devices to support TI research.

## **Data Availability Statement**

All data produced in the present study are available upon request to the authors.



## References

1. Fiest KM, Sauro KM, Wiebe S, et al. Prevalence and incidence of epilepsy: A systematic review and meta-analysis of international studies. *Neurology*. 2017;88(3):296-303. doi:10.1212/WNL.0000000000003509
2. Ryvlin P, Cross JH, Rheims S. Epilepsy surgery in children and adults. *Lancet Neurol*. 2014;13(11):1114-1126. doi:10.1016/S1474-4422(14)70156-5
3. Li MCH, Cook MJ. Deep brain stimulation for drug-resistant epilepsy. *Epilepsia*. 2018;59(2):273-290. doi:10.1111/epi.13964
4. Satya-Murti S, Shepard KM, Helmers SL. Vagus nerve stimulation in the treatment of epilepsy. *Neurology Clinical Practice*. 2013;3(5):431-435. doi:10.1212/CPJ.0b013e3182a3931f
5. Ellrich J. Transcutaneous Auricular Vagus Nerve Stimulation. *Journal of Clinical Neurophysiology*. 2019;36(6):437. doi:10.1097/WNP.0000000000000576
6. Toffa DH, Touma L, Meskine TE, Bouthillier A, Nguyen DK. Learnings from 30 years of reported efficacy and safety of vagus nerve stimulation (VNS) for epilepsy treatment: A critical review. *Seizure - European Journal of Epilepsy*. 2020;83:104-123. doi:10.1016/j.seizure.2020.09.027
7. Panov F, Ganaha S, Haskell J, et al. Safety of responsive neurostimulation in pediatric patients with medically refractory epilepsy. *Journal of Neurosurgery: Pediatrics*. 2020;26(5):525-532. doi:10.3171/2020.5.PEDS20118
8. Warren AEL, Dalic LJ, Thevathasan W, Roten A, Bulluss KJ, Archer J. Targeting the centromedian thalamic nucleus for deep brain stimulation. *J Neurol Neurosurg Psychiatry*. 2020;91(4):339-349. doi:10.1136/jnnp-2019-322030
9. Vonck K, Sprengers M, Carrette E, et al. A decade of experience with deep brain stimulation for patients with refractory medial temporal lobe epilepsy. *Int J Neural Syst*. 2013;23(1):1250034. doi:10.1142/S0129065712500347
10. Velasco AL, Velasco F, Velasco M, Jiménez F, Carrillo-Ruiz JD, Castro G. The role of neuromodulation of the hippocampus in the treatment of intractable complex partial seizures of the temporal lobe. *Acta Neurochir Suppl*. 2007;97(Pt 2):329-332. doi:10.1007/978-3-211-33081-4\_36
11. Salanova V, Witt T, Worth R, et al. Long-term efficacy and safety of thalamic stimulation for drug-resistant partial epilepsy. *Neurology*. 2015;84(10):1017-1025. doi:10.1212/WNL.0000000000001334
12. Fisher R, Salanova V, Witt T, et al. Electrical stimulation of the anterior nucleus of thalamus for treatment of refractory epilepsy. *Epilepsia*. 2010;51(5):899-908. doi:10.1111/j.1528-1167.2010.02536.x
13. Velasco AL, Velasco F, Velasco M, Trejo D, Castro G, Carrillo-Ruiz JD. Electrical stimulation of the hippocampal epileptic foci for seizure control: a double-blind, long-term follow-up study. *Epilepsia*. 2007;48(10):1895-1903. doi:10.1111/j.1528-1167.2007.01181.x

14. McLachlan RS, Pigott S, Tellez-Zenteno JF, Wiebe S, Parrent A. Bilateral hippocampal stimulation for intractable temporal lobe epilepsy: impact on seizures and memory. *Epilepsia*. 2010;51(2):304-307. doi:10.1111/j.1528-1167.2009.02332.x
15. Tyrand R, Seeck M, Spinelli L, et al. Effects of amygdala–hippocampal stimulation on interictal epileptic discharges. *Epilepsy Research*. 2012;99(1):87-93. doi:10.1016/j.eplesyres.2011.10.026
16. Cukiert A, Cukiert CM, Argentoni-Balochi M, et al. Intraoperative neurophysiological responses in epileptic patients submitted to hippocampal and thalamic deep brain stimulation. *Seizure*. 2011;20(10):748-753. doi:10.1016/j.seizure.2011.07.003
17. Skelton HM, Brandman DM, Bullinger K, Isbaine F, Gross RE. Distinct Biomarkers of ANT Stimulation and Seizure Freedom in an Epilepsy Patient with Ambulatory Hippocampal Electrocorticography. *Stereotact Funct Neurosurg*. 2023;101(6):349-358. doi:10.1159/000533680
18. Silva AB, Khambhati AN, Speidel BA, Chang EF, Rao VR. Effects of anterior thalamic nuclei stimulation on hippocampal activity: Chronic recording in a patient with drug-resistant focal epilepsy. *Epilepsy & Behavior Reports*. 2021;16:100467. doi:10.1016/j.ebr.2021.100467
19. Voges BR, Schmitt FC, Hamel W, et al. Deep brain stimulation of anterior nucleus thalami disrupts sleep in epilepsy patients. *Epilepsia*. 2015;56(8):e99-e103. doi:10.1111/epi.13045
20. Drane DL, Pedersen NP. Finding the Sweet Spot: Fine-Tuning DBS Parameters to Cure Seizures While Avoiding Psychiatric Complications. *Epilepsy Curr*. 2019;19(3):174-176. doi:10.1177/1535759719845326
21. Järvenpää S, Peltola J, Rainesalo S, Leinonen E, Lehtimäki K, Järventausta K. Reversible psychiatric adverse effects related to deep brain stimulation of the anterior thalamus in patients with refractory epilepsy. *Epilepsy Behav*. 2018;88:373-379. doi:10.1016/j.yebeh.2018.09.006
22. Schulz R, Gerloff C, Hummel FC. Non-invasive brain stimulation in neurological diseases. *Neuropharmacology*. 2013;64:579-587. doi:10.1016/j.neuropharm.2012.05.016
23. Polanía R, Nitsche MA, Ruff CC. Studying and modifying brain function with non-invasive brain stimulation. *Nat Neurosci*. 2018;21(2):174-187. doi:10.1038/s41593-017-0054-4
24. Vöröslakos M, Takeuchi Y, Brinyiczki K, et al. Direct effects of transcranial electric stimulation on brain circuits in rats and humans. *Nat Commun*. 2018;9(1):483. doi:10.1038/s41467-018-02928-3
25. Grossman N, Bono D, Dedic N, et al. Noninvasive Deep Brain Stimulation via Temporally Interfering Electric Fields. *Cell*. 2017;169(6):1029-1041.e16. doi:10.1016/j.cell.2017.05.024
26. Wessel MJ, Beanato E, Popa T, et al. Noninvasive theta-burst stimulation of the human striatum enhances striatal activity and motor skill learning. *Nat Neurosci*. 2023;26(11):2005-2016. doi:10.1038/s41593-023-01457-7

27. Acerbo E, Jegou A, Luff C, et al. Focal non-invasive deep-brain stimulation with temporal interference for the suppression of epileptic biomarkers. *Front Neurosci.* 2022;16:945221. doi:10.3389/fnins.2022.945221
28. Missey F, Rusina E, Acerbo E, et al. Orientation of Temporal Interference for Non-invasive Deep Brain Stimulation in Epilepsy. *Front Neurosci.* 2021;15:633988. doi:10.3389/fnins.2021.633988
29. Botzanowski B, Donahue MJ, Ejneby MS, et al. Noninvasive Stimulation of Peripheral Nerves using Temporally-Interfering Electrical Fields. *Adv Healthc Mater.* 2022;11(17):e2200075. doi:10.1002/adhm.202200075
30. Carmona-Barrón VG, Fernández del Campo IS, Delgado-García JM, De la Fuente AJ, Lopez IP, Merchán MA. Comparing the effects of transcranial alternating current and temporal interference (tTIS) electric stimulation through whole-brain mapping of c-Fos immunoreactivity. *Front Neuroanat.* 2023;17. doi:10.3389/fnana.2023.1128193
31. Song S, Zhang J, Tian Y, Wang L, Wei P. Temporal Interference Stimulation Regulates Eye Movements and Neural Activity in the Mice Superior Colliculus. *Annu Int Conf IEEE Eng Med Biol Soc.* 2021;2021:6231-6234. doi:10.1109/EMBC46164.2021.9629968
32. Missey F, Ejneby MS, Ngom I, et al. Obstructive sleep apnea improves with non-invasive hypoglossal nerve stimulation using temporal interference. *Bioelectronic Medicine.* 2023;9(1):18. doi:10.1186/s42234-023-00120-7
33. Botzanowski B, Acerbo E, Lehmann S, et al. Controlling focality and intensity of non-invasive deep brain stimulation using multipolar temporal interference in non-human primates and rodents. Published online September 6, 2023:2023.09.05.556444. doi:10.1101/2023.09.05.556444
34. Violante IR, Alania K, Cassarà AM, et al. Non-invasive temporal interference electrical stimulation of the human hippocampus. *Nat Neurosci.* 2023;26(11):1994-2004. doi:10.1038/s41593-023-01456-8
35. Medina Villalon S, Paz R, Roehri N, et al. EpiTools, A software suite for presurgical brain mapping in epilepsy: Intracerebral EEG. *J Neurosci Methods.* 2018;303:7-15. doi:10.1016/j.jneumeth.2018.03.018
36. IT'IS Database for Thermal and Electromagnetic Parameters of Biological Tissues – ScienceOpen. Accessed April 15, 2024. <https://www.scienceopen.com/document?vid=a95fbaa4-efd8-429a-a59e-5e208fea2e45>
37. Colombet B, Woodman M, Badier JM, Bénar CG. AnyWave: a cross-platform and modular software for visualizing and processing electrophysiological signals. *J Neurosci Methods.* 2015;242:118-126. doi:10.1016/j.jneumeth.2015.01.017
38. Roehri N, Pizzo F, Lagarde S, et al. High-frequency oscillations are not better biomarkers of epileptogenic tissues than spikes. *Ann Neurol.* 2018;83(1):84-97. doi:10.1002/ana.25124
39. Cavarretta, F., Carnevale, N.T., Tegolo, D. & Migliore, M. Effects of low frequency electric fields on synaptic integration in hippocampal CA1 pyramidal neurons: implications for power line emissions. *Front. Cell. Neurosci.* 2014;8:310. doi:10.3389/fncel.2014.00310.



40. Migliore R, De Simone G, Leinekugel X, Migliore M. The possible consequences for cognitive functions of external electric fields at power line frequency on hippocampal CA1 pyramidal neurons. *Eur J Neurosci*. 2017 Apr;45(8):1024-1031. doi:10.1111/ejn.13325.
41. Migliore, M., Novara, G. & Tegolo, D. Single neuron binding properties and the magical number 7. *Hippocampus*. 2008;18:1122–1130. doi:10.1002/hipo.20471.
42. Hines, M.L. & Carnevale, N.T. The NEURON Simulation Environment. *Neural Comput*. 1997;9:1179–1209. doi:10.1162/neco.1997.9.6.1179.
43. Mooij AH, Raijmann RCMA, Jansen FE, Braun KPJ, Zijlmans M. Physiological Ripples ( $\pm 100$  Hz) in Spike-Free Scalp EEGs of Children With and Without Epilepsy. *Brain Topogr*. 2017;30(6):739-746. doi:10.1007/s10548-017-0590-y
44. Urrestarazu E, Chander R, Dubeau F, Gotman J. Interictal high-frequency oscillations (100–500 Hz) in the intracerebral EEG of epileptic patients. *Brain*. 2007;130(9):2354-2366. doi:10.1093/brain/awm149
45. Mina F, Benquet P, Pasnicu A, Biraben A, Wendling F. Modulation of epileptic activity by deep brain stimulation: a model-based study of frequency-dependent effects. *Front Comput Neurosci*. 2013;7. doi:10.3389/fncom.2013.00094
46. Mirzakhaili E, Barra B, Capogrosso M, Lempka SF. Biophysics of Temporal Interference Stimulation. *Cell Syst*. 2020 Dec 16;11(6):557-572.e5. doi:10.1016/j.cels.2020.10.004.
47. Hill AV, Katz B, Solandt DY. Nerve excitation by alternating current. *Proceedings of the Royal Society of London Series B - Biological Sciences*. 1997;121(821):74-133. doi:10.1098/rspb.1936.0053
48. Jacobs J, Golla T, Mader M, et al. Electrical stimulation for cortical mapping reduces the density of high frequency oscillations. *Epilepsy Research*. 2014;108(10):1758-1769. doi:10.1016/j.eplesyres.2014.09.022
49. Paschen E, Elgueta C, Heining K, et al. Hippocampal low-frequency stimulation prevents seizure generation in a mouse model of mesial temporal lobe epilepsy. Huguenard JR, Kadam SD, eds. *eLife*. 2020;9:e54518. doi:10.7554/eLife.54518
50. Luff CE, Dzialecka P, Acerbo E, Williamson A, Grossman N. Pulse-width modulated temporal interference (PWM-TI) brain stimulation. *Brain Stimulation*. 2024;17(1):92-103. doi:10.1016/j.brs.2023.12.010
51. Acerbo E, Botzanowski B, Dellavale D, et al. Improved Temporal and Spatial Focality of Non-invasive Deep-brain Stimulation using Multipolar Single-pulse Temporal Interference with Applications in Epilepsy. Published online January 14, 2024:2024.01.11.575301. doi:10.1101/2024.01.11.575301
52. Cukiert A, Cukiert CM, Burattini JA, Mariani PP, Bezerra DF. Seizure outcome after hippocampal deep brain stimulation in patients with refractory temporal lobe epilepsy: A prospective, controlled, randomized, double-blind study. *Epilepsia*. 2017;58(10):1728-1733. doi:10.1111/epi.13860
53. Cukiert A, Cukiert CM, Burattini JA, Mariani PP. Long-term seizure outcome during continuous bipolar hippocampal deep brain stimulation in patients with temporal lobe epilepsy with or without mesial temporal sclerosis: An observational, open-label study. *Epilepsia*. 2021;62(1):190-197. doi:10.1111/epi.16776

54. Velasco F, Velasco M, Velasco AL, Menez D, Rocha L. Electrical stimulation for epilepsy: stimulation of hippocampal foci. *Stereotact Funct Neurosurg*. 2001;77(1-4):223-227. doi:10.1159/000064610

55. Karakis I, Lynam C, Taraschenko O, Staikova E, Drane DL. Concurrent EEG monitoring helps interpret neuropsychological testing results in patients with epilepsy. *Epilepsy Behav*. 2020;111:107275. doi:10.1016/j.yebeh.2020.107275

56. Glennon JM, Weiss-Croft L, Harrison S, Cross JH, Boyd SG, Baldeweg T. Interictal epileptiform discharges have an independent association with cognitive impairment in children with lesional epilepsy. *Epilepsia*. 2016;57(9):1436-1442. doi:10.1111/epi.13479

57. Dinkelacker V, Xin X, Baulac M, Samson S, Dupont S. Interictal epileptic discharge correlates with global and frontal cognitive dysfunction in temporal lobe epilepsy. *Epilepsy Behav*. 2016;62:197-203. doi:10.1016/j.yebeh.2016.07.009

58. Drane DL, Ojemann JG, Kim MS, et al. Interictal epileptiform discharge effects on neuropsychological assessment and epilepsy surgical planning. *Epilepsy Behav*. 2016;56:131-138. doi:10.1016/j.yebeh.2016.01.001

## Supplementary Figures:

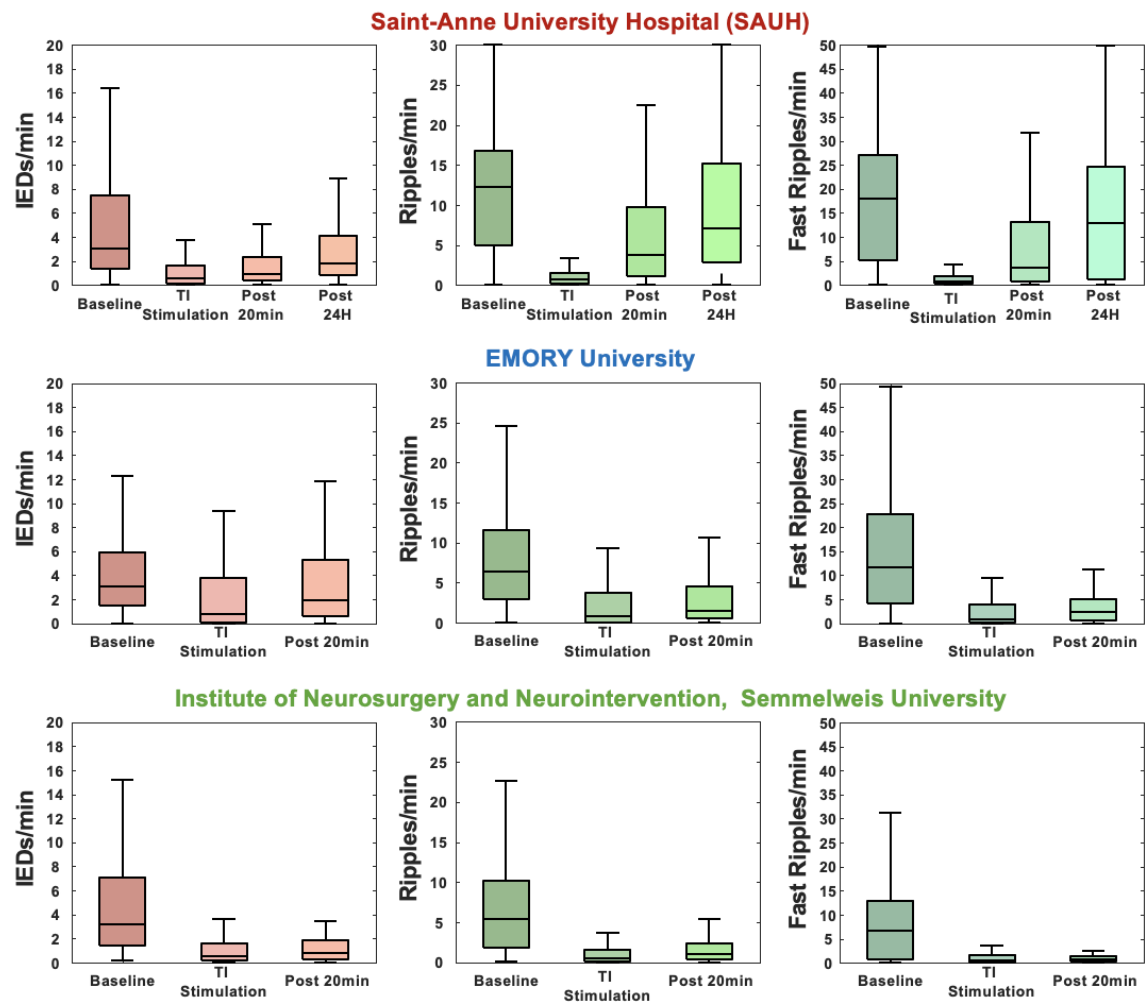

Figure S1. Center-by-center analysis.

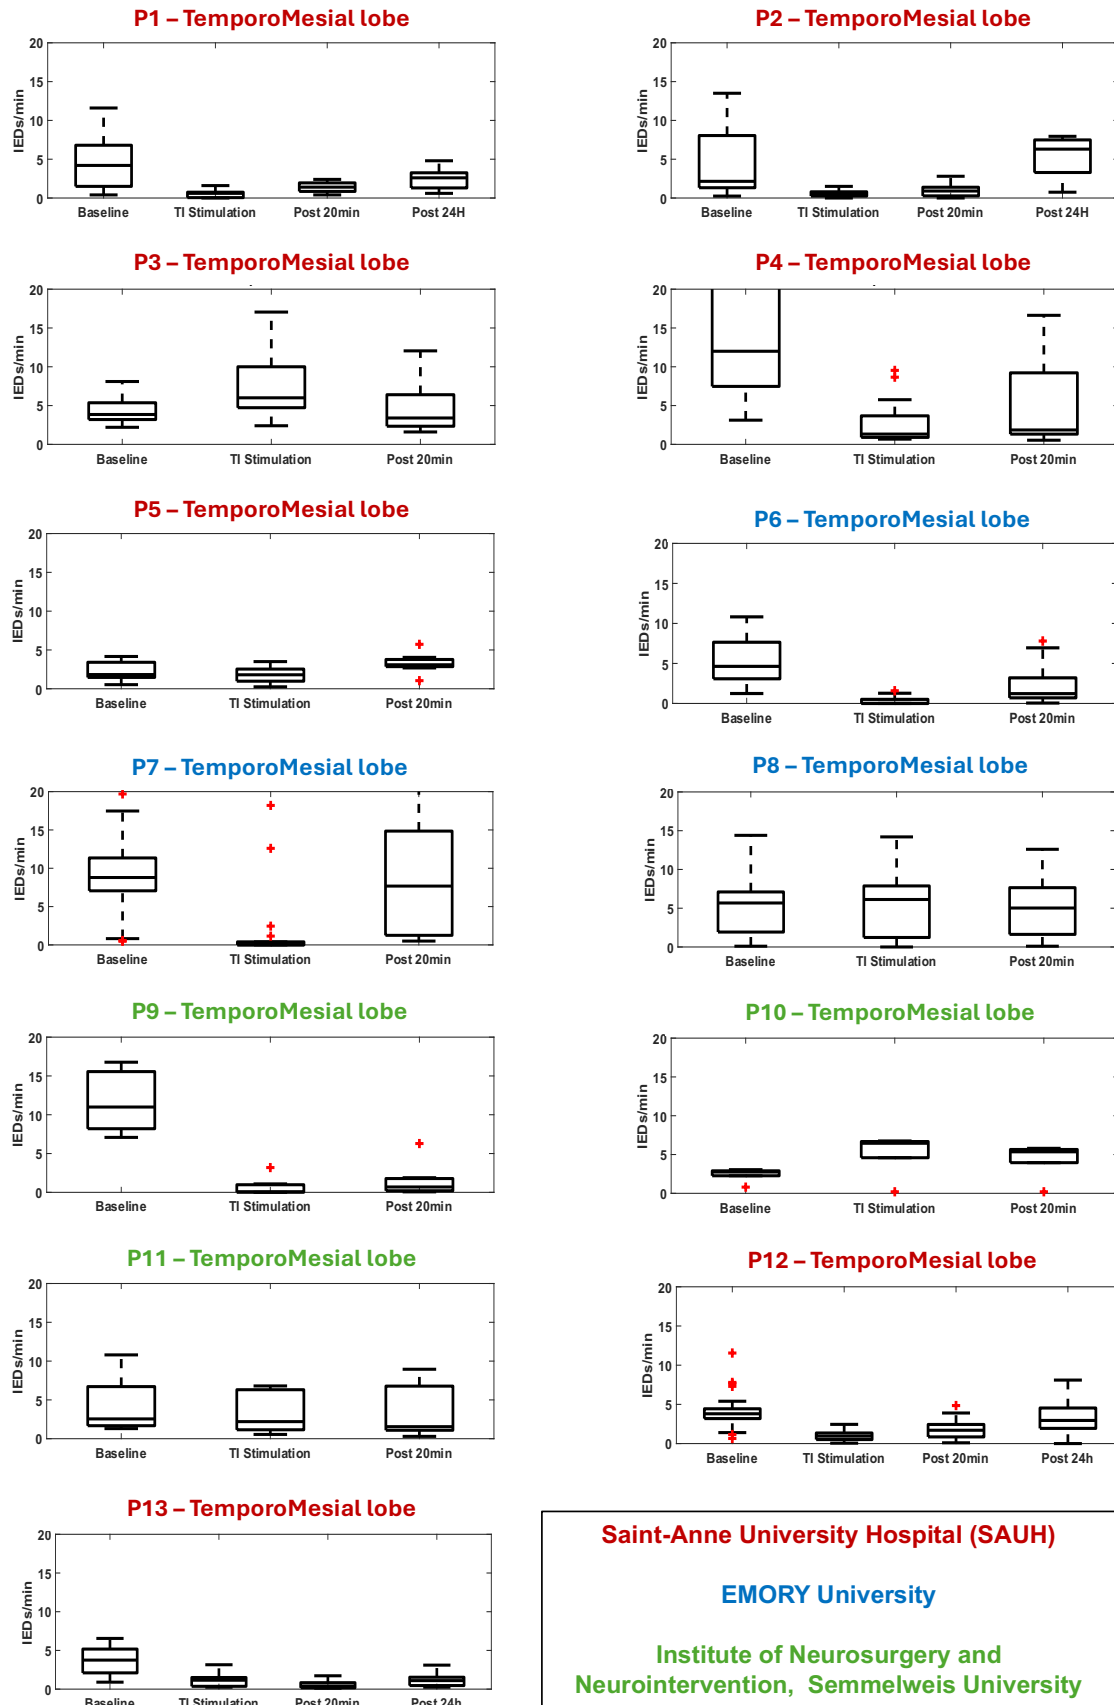

Figure S2. Single patient interictal epileptiform discharge analysis.

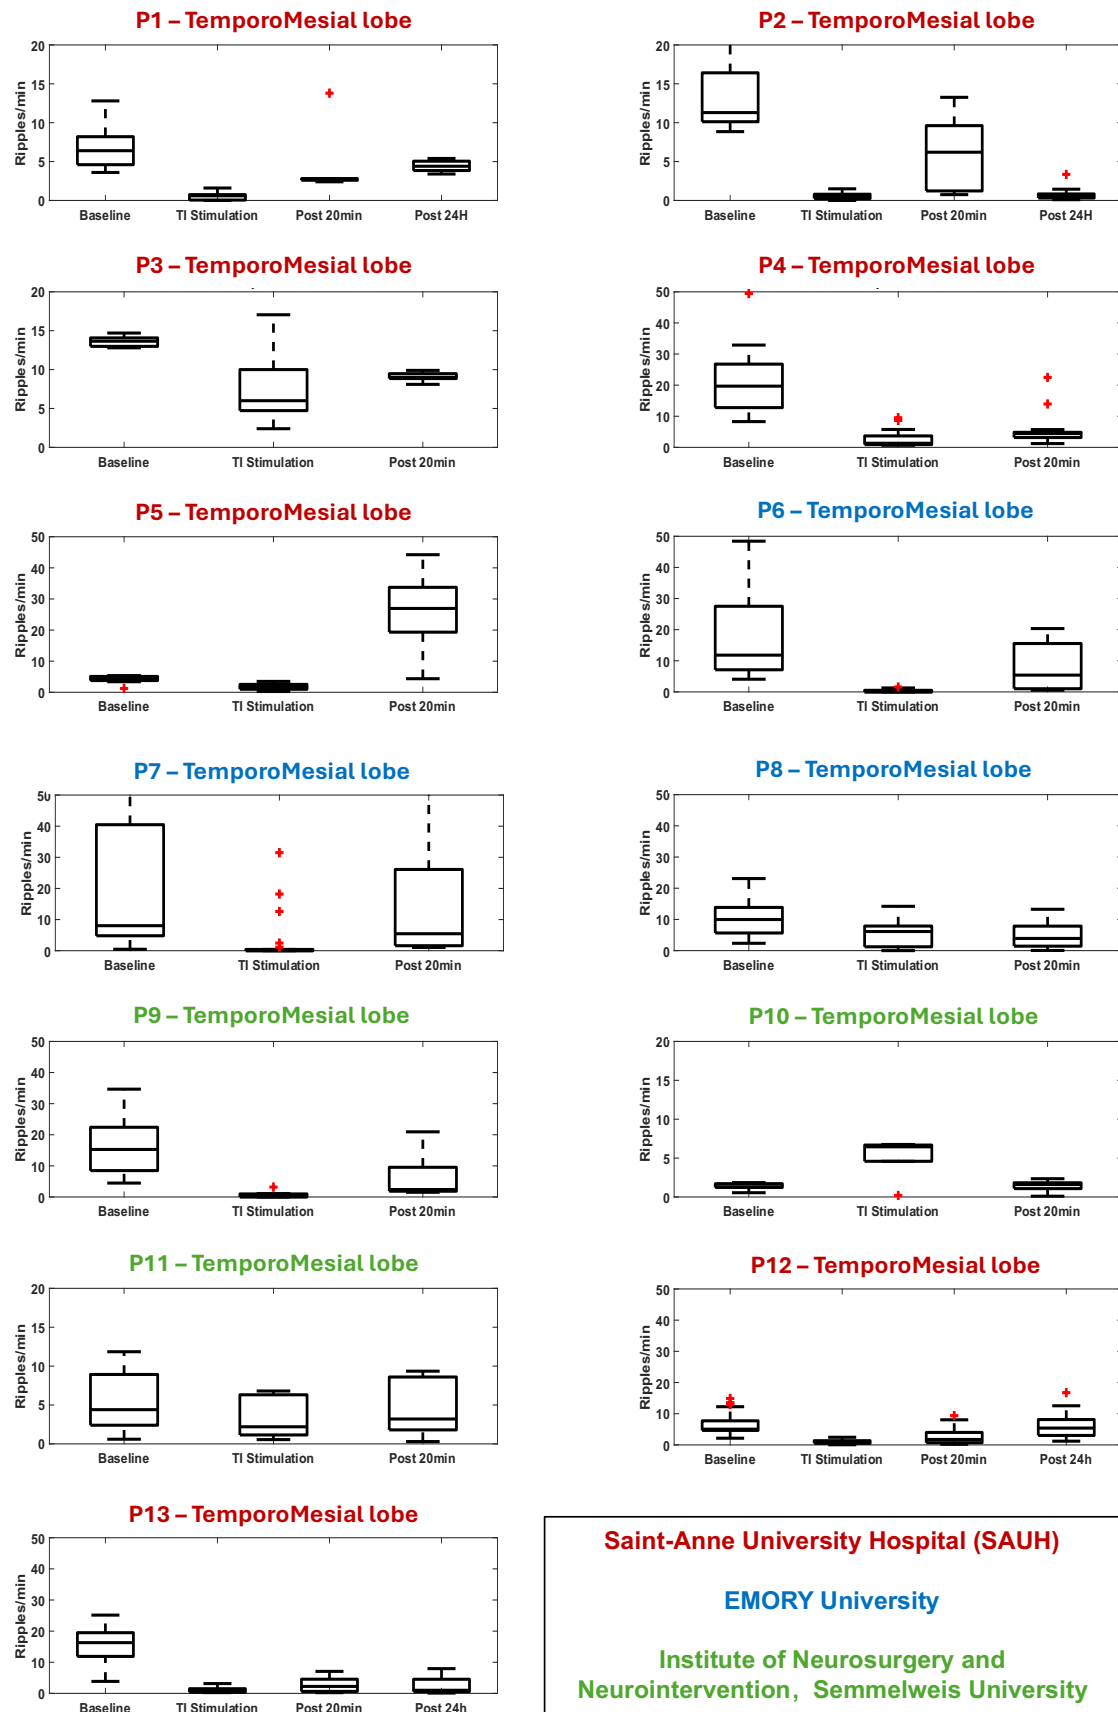

Figure S3. Single patient ripples analysis.

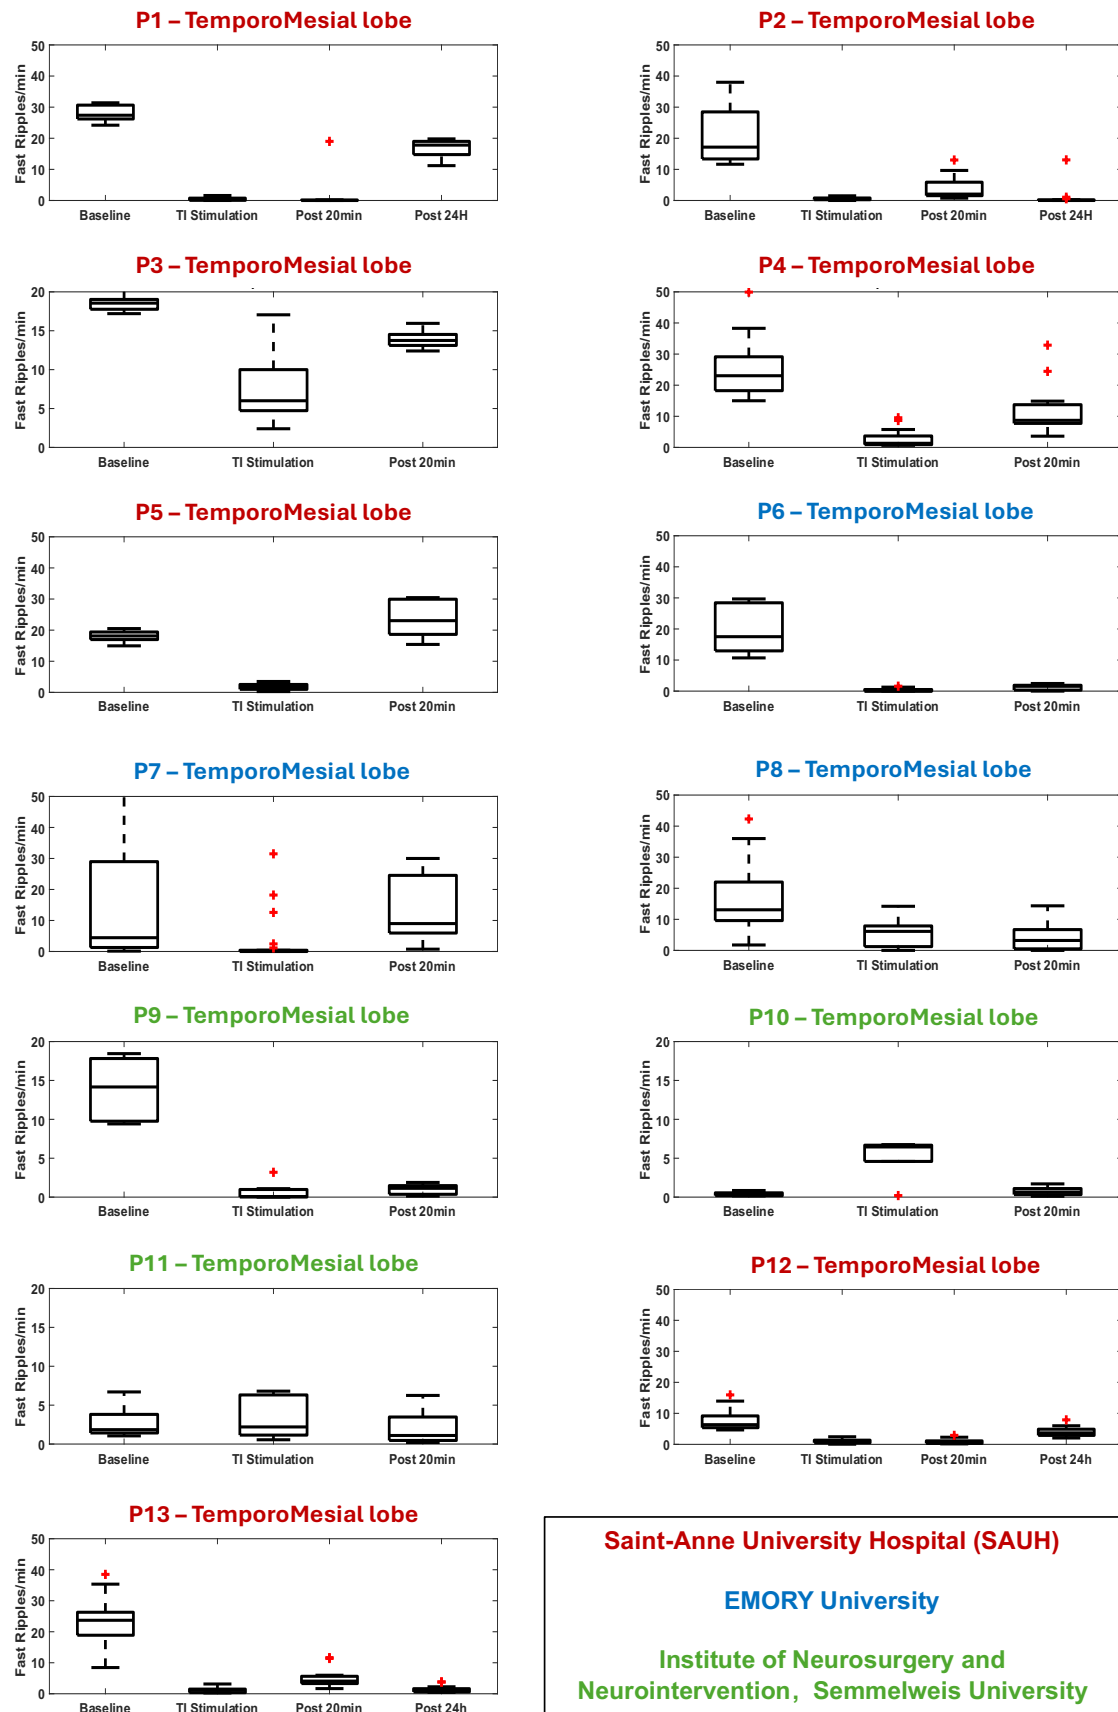

Figure S4. Single patient fast ripples analysis.

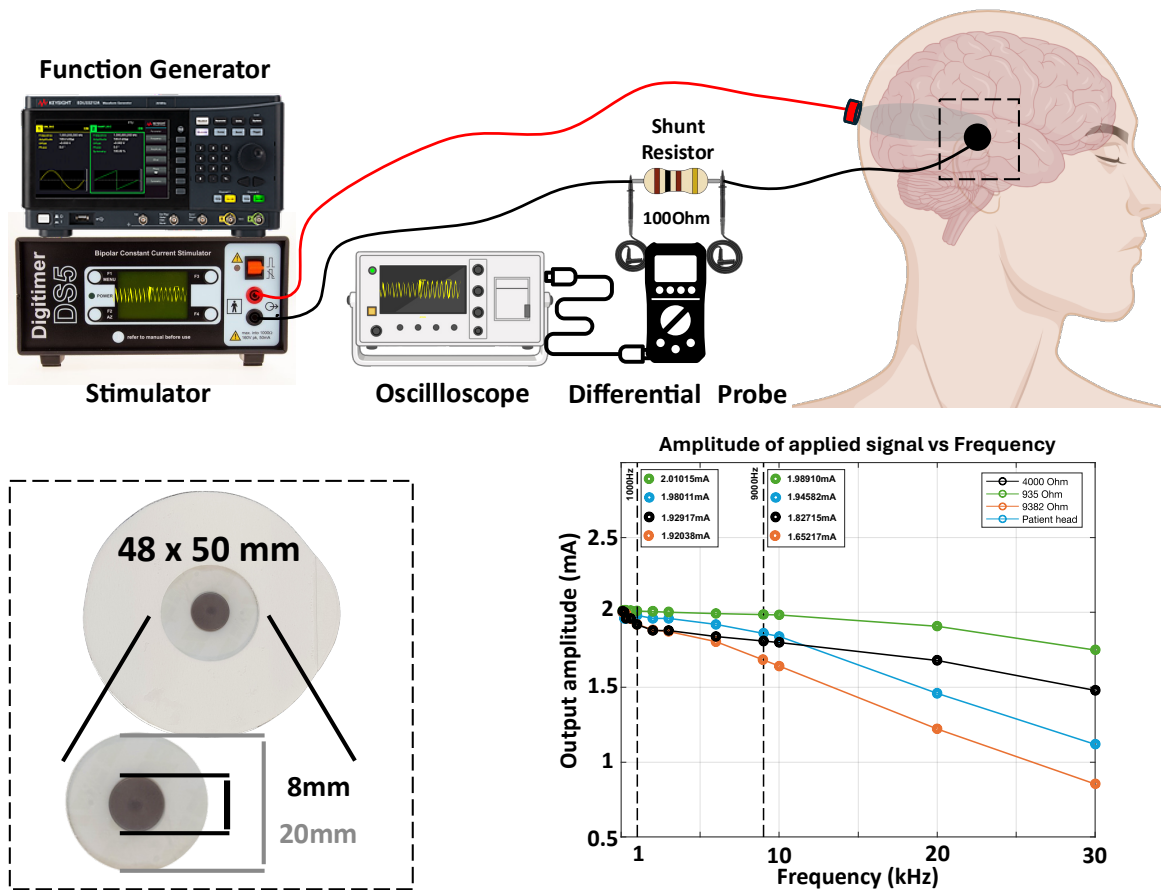

Figure S5. Simulations of the TI stimulation for different carrier frequencies. Measurement across a 100Ohm resistor of the output current as a function of the frequency applied via the Keysight and DS5. The relationship shows no significant applied current difference between lower carrier values (1000Hz) and higher carrier values (9000Hz) for a biological impedance (patient head), effectively demonstrating the devices show no frequency roll-off effects from the spectrum of carrier values and impedances that were used in the study.

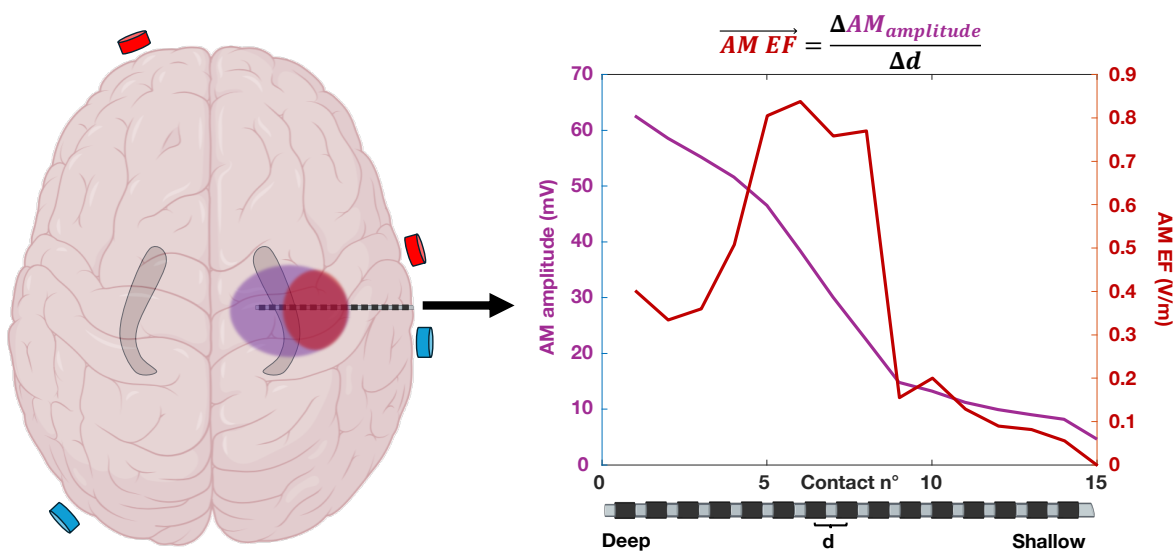

Figure S6. Recorded AM amplitude and calculated AM EF along an sEEG electrode targeting the hippocampus.
